# Supplementary material for: Mutant KLF1 in Adult Anemic Nan Mice Leads to Profound Transcriptome Changes and Disordered Erythropoiesis
Source: PubMed Central journal article supplement (PMC6109071; doi:10.1038/s41598-018-30839-2), 2018-08-24
Supplement: 41598_2018_30839_MOESM2_ESM.pdf [file 41598_2018_30839_MOESM2_ESM.pdf]

**Mutant KLF1 in Adult Anemic *Nan* Mice Leads to Profound Transcriptome Changes and Disordered Erythropoiesis**

Danitza Nébor, Joel H. Graber, Steven L. Ciciotte, Raymond F. Robledo, Julien Papoin, Emily Hartman, Kevin R. Gillinder, Andrew C. Perkins, James J. Bieker, Lionel Blanc, and Luanne L. Peters

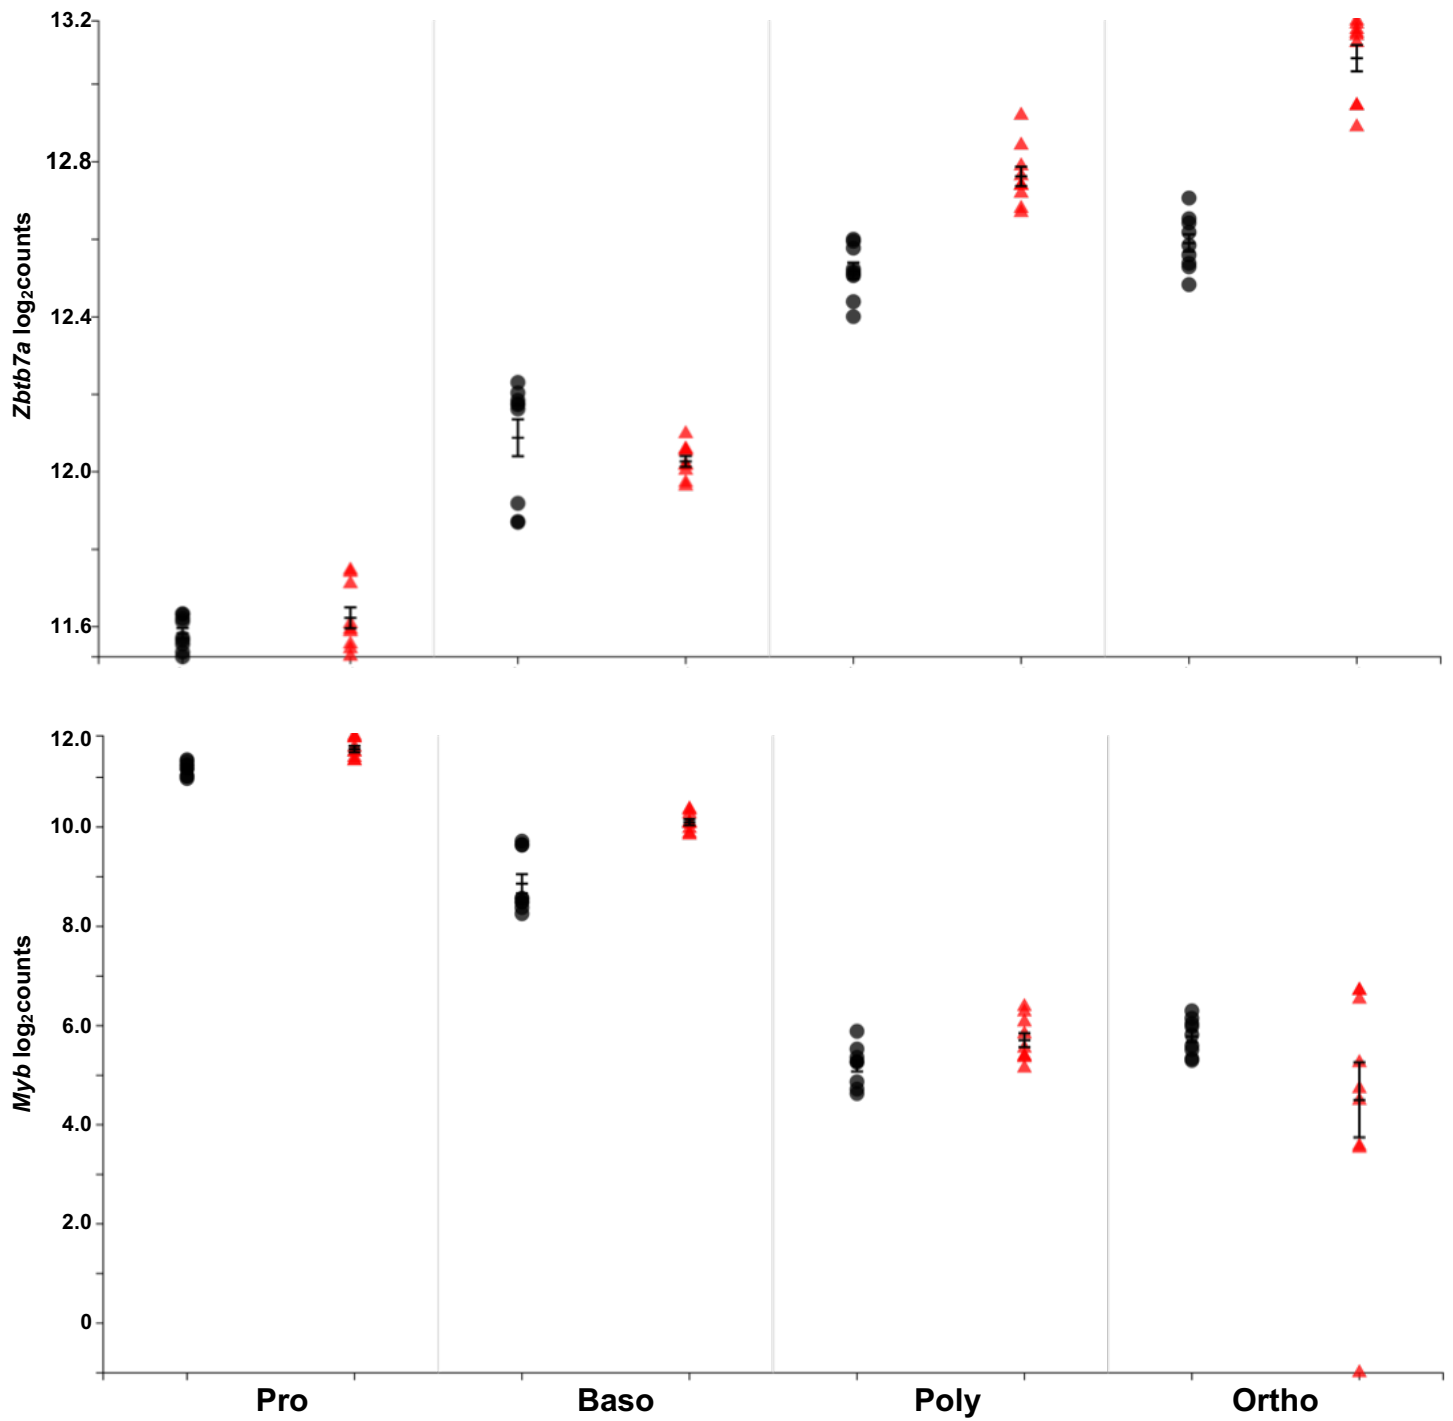

**Supplemental figure 1.** Expression of *Zbtb7a* and *Myb* in *Nan* and WT-PHB spleen erythroid precursors (RNAseq).

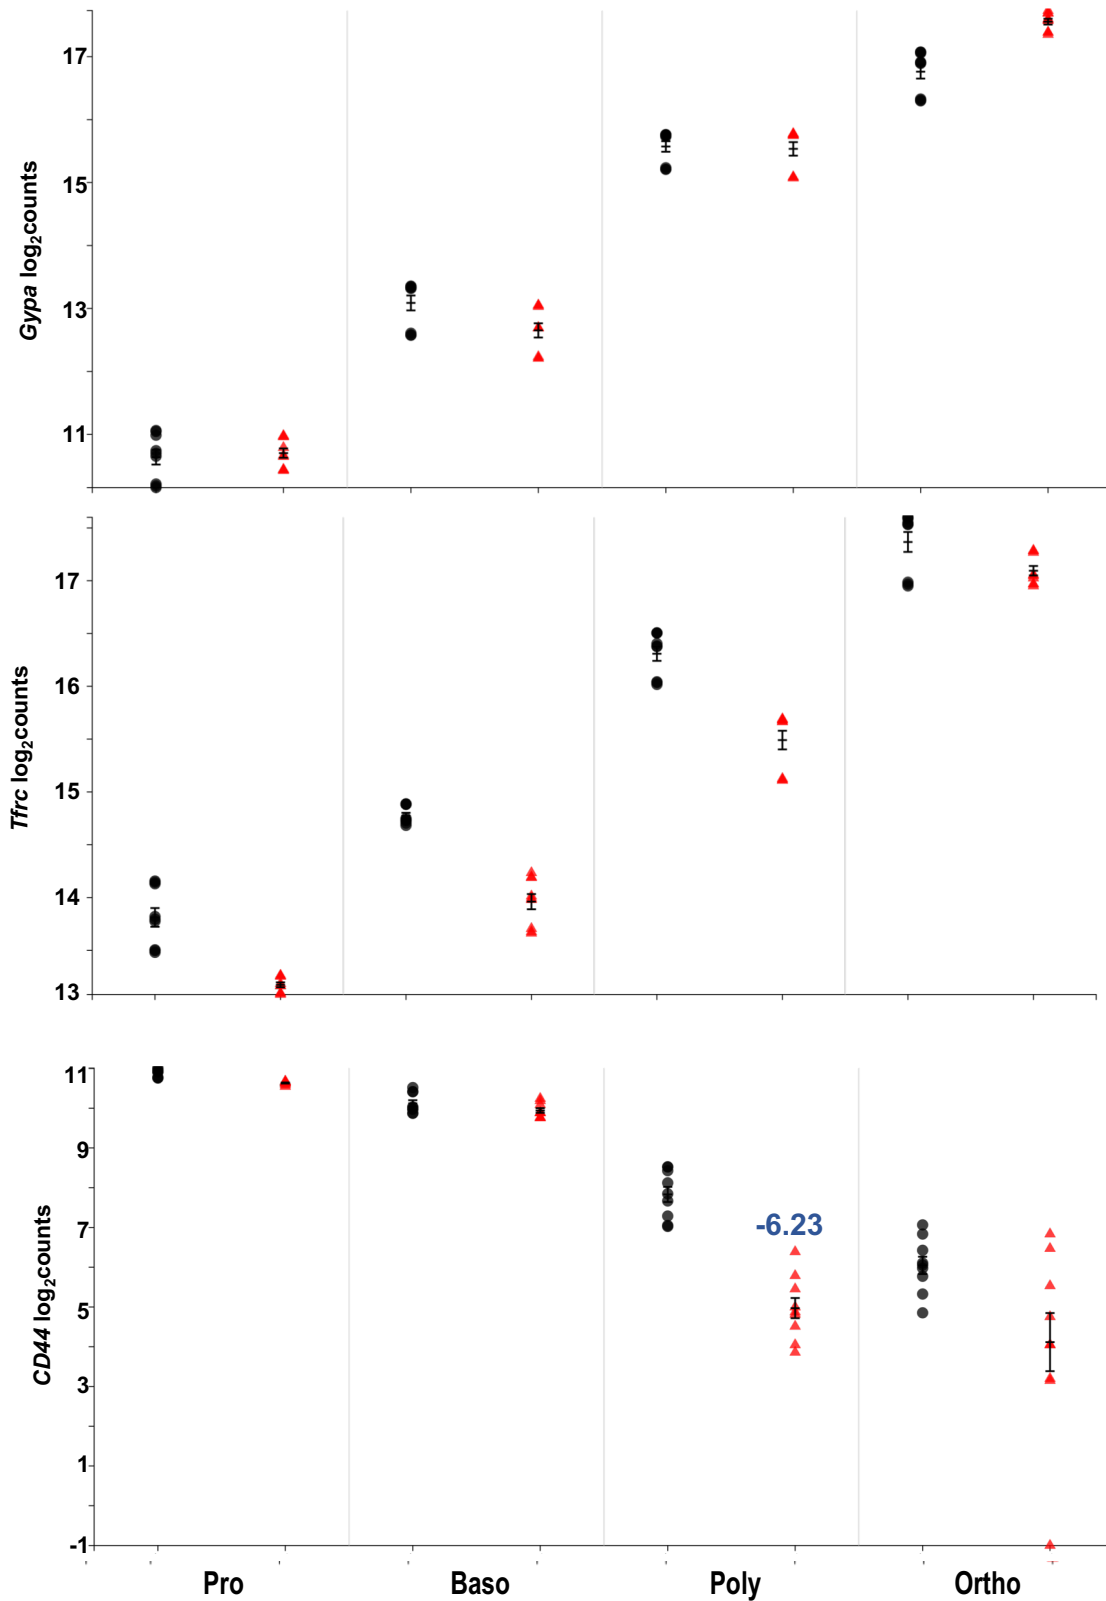

**Supplemental figure 2.** Surface markers for flow-cytometric analysis of erythropoiesis. With the exception of CD44 in polychromatophilic erythroblasts, which is downregulated in *Nan* (6.23 fold), no significant differential expression is seen in *Nan* vs. WT-PHB precursors (see also supplemental Tables 3-6). *Gypa* encodes mouse Ter119; *Tfrc* encodes surface marker CD71 (transferrin receptor).

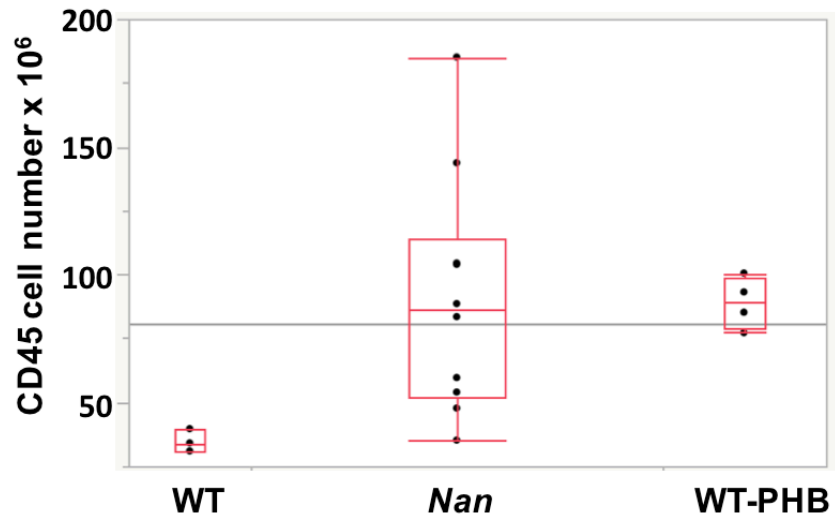

**Supplemental figure 3.** Boxplots illustrating range of values for erythroid cell counts in WT, *Nan* and WT-PHB spleen.

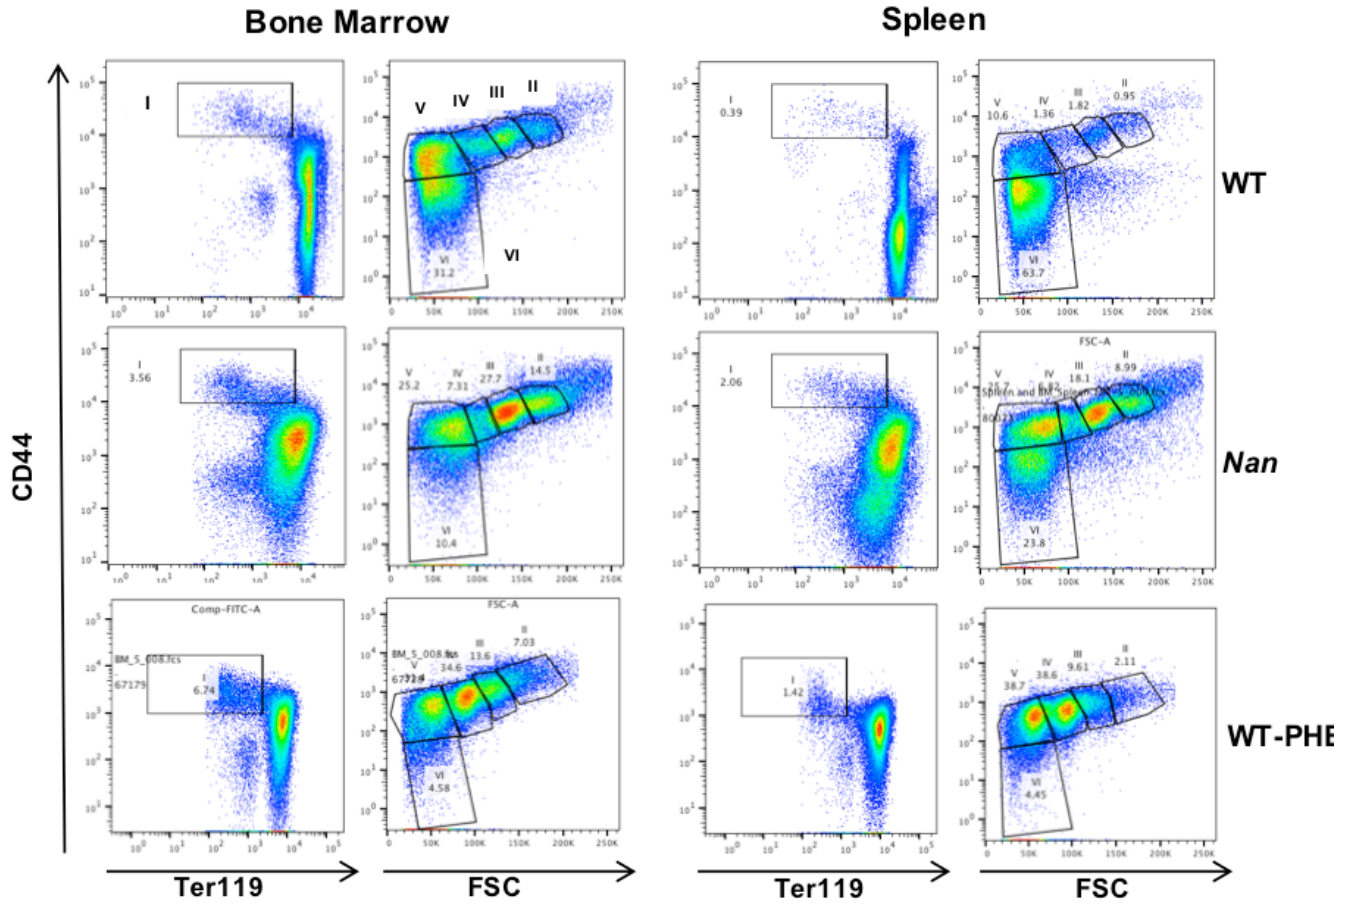

**Supplemental figure 4.** Flow cytograms showing gating of cell populations in bone marrow and spleen. I, pro-; II, baso-; III, Poly-; IV, orthochromatophilic erythroblasts; V, reticulocytes; VI, mature red cells

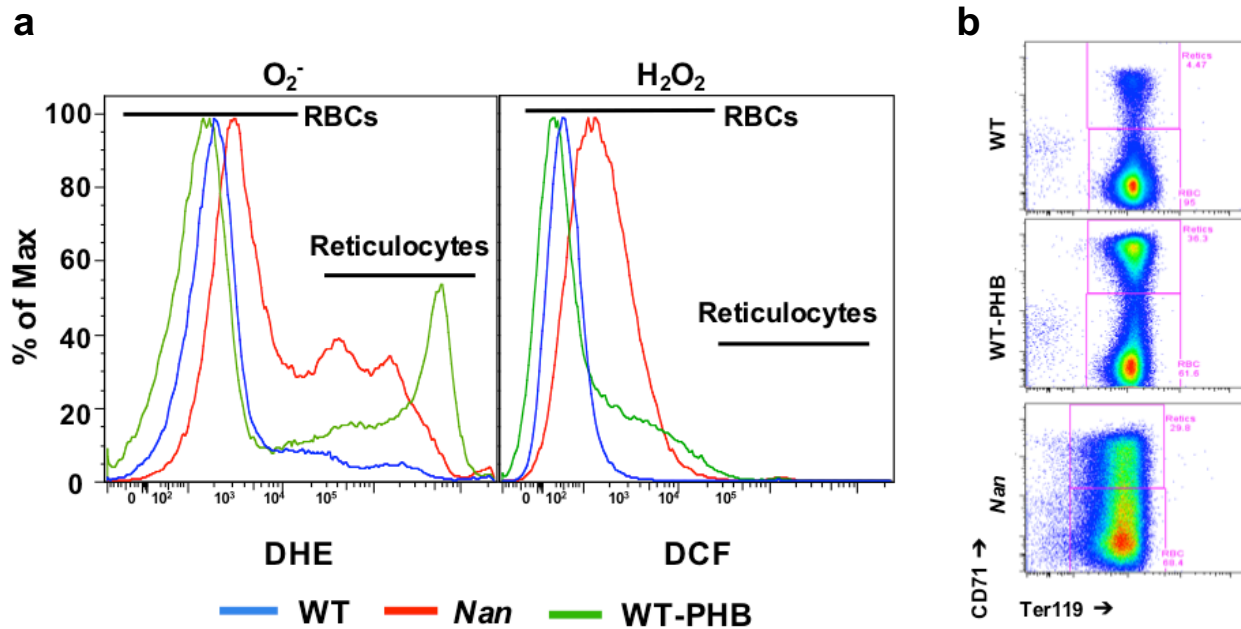

**Supplemental figure 5. (a)** Representative flow cytometric analysis of WT, WT-PHB, and *Nan* whole blood incubated with superoxide-sensitive dye DHE and peroxide-sensitive H2DCFDA (DCF). Mature red cells are the major peak while reticulocytes, which produce higher ROS levels, are in the tail. **(b)** Separation of reticulocyte and RBCs populations in whole blood using CD71 and Ter119.
